# Supplementary material for: Uncertainty-based inference of a common cause for body ownership
Source: eLife journal article supplement (doi:10.7554/elife.77221), 2022-09-27
Supplement: supp [file elife-77221-supp-v1.zip]

| Participant | Q1  | Q2  | Q3  | Q4   | Q5   | Q6   | Q7   | Q8   | Q9   | Mean Ownership | Mean Control | Difference (ownership - control) |
|-------------|-----|-----|-----|------|------|------|------|------|------|----------------|--------------|----------------------------------|
| S1          | 3,0 | 3,0 | 2,0 | 0,3  | -0,3 | 1,0  | 0,3  | 0,0  | -0,7 | 2,7            | 0,1          | 2,6                              |
| S2          | 2,7 | 2,7 | 2,3 | -3,0 | -3,0 | -2,0 | -3,0 | -3,0 | -3,0 | 2,6            | -2,8         | 5,4                              |
| S3          | 3,0 | 2,3 | 2,3 | 0,7  | 1,0  | 1,3  | -1,0 | -2,0 | -2,7 | 2,6            | -0,4         | 3,0                              |
| S4          | 2,3 | 2,3 | 1,3 | 0,3  | -2,7 | -2,3 | -2,7 | -2,0 | -3,0 | 2,0            | -2,1         | 4,1                              |
| S5          | 2,3 | 1,7 | 2,0 | -2,7 | -2,7 | -1,7 | 0,7  | -3,0 | 0,7  | 2,0            | -1,4         | 3,4                              |
| S6          | 2,7 | 2,7 | 2,7 | -3,0 | 0,0  | -3,0 | -3,0 | -3,0 | -2,7 | 2,7            | -2,4         | 5,1                              |
| S7          | 3,0 | 3,0 | 1,7 | -0,7 | -1,7 | 1,0  | -2,3 | -1,0 | -3,0 | 2,6            | -1,3         | 3,8                              |
| S8          | 2,3 | 2,0 | 0,7 | 0,3  | -1,0 | -1,3 | -0,7 | -0,7 | -1,3 | 1,7            | -0,8         | 2,4                              |
| S9          | 2,0 | 2,0 | 2,0 | -3,0 | -3,0 | -2,3 | -2,7 | -2,3 | -3,0 | 2,0            | -2,7         | 4,7                              |
| S10         | 3,0 | 3,0 | 2,0 | -3,0 | 0,0  | -3,0 | -3,0 | -3,0 | -2,7 | 2,7            | -2,4         | 5,1                              |
| S11         | 3,0 | 2,0 | 1,3 | -0,7 | -0,7 | -2,7 | -3,0 | -2,7 | -2,3 | 2,1            | -2,0         | 4,1                              |
| S12         | 3,0 | 2,7 | 1,0 | -2,0 | -2,7 | -2,7 | -2,3 | -3,0 | 1,0  | 2,2            | -1,9         | 4,2                              |
| S13         | 3,0 | 3,0 | 2,7 | 2,0  | -3,0 | -1,3 | 1,7  | 0,3  | 3,0  | 2,9            | 0,4          | 2,4                              |
| S14         | 3,0 | 3,0 | 2,7 | -3,0 | -3,0 | -3,0 | -2,3 | -3,0 | 1,7  | 2,9            | -2,1         | 5,0                              |
| S15         | 2,0 | 1,0 | 2,0 | -2,0 | -1,3 | -2,0 | -3,0 | -2,3 | -3,0 | 1,7            | -2,3         | 3,9                              |

**Figure 4 – Supplement 2: Mean questionnaire's results for the participants included in the main experiment.** The inclusion procedure was repeated three times per participant. Inclusion criteria for a rubber hand illusion strong enough for participation in the main psychophysics experiment were as follows: i) a mean score for the illusion statements (Q1, Q2, Q3) of greater than 1 and ii) a difference between the mean score for the illusion items and the mean score for the control items of greater than 1
