# Supplementary material for: Uncertainty-based inference of a common cause for body ownership
Source: eLife journal article supplement (doi:10.7554/elife.77221), 2022-09-27
Supplement: supp [file elife-77221-supp-v1.zip]

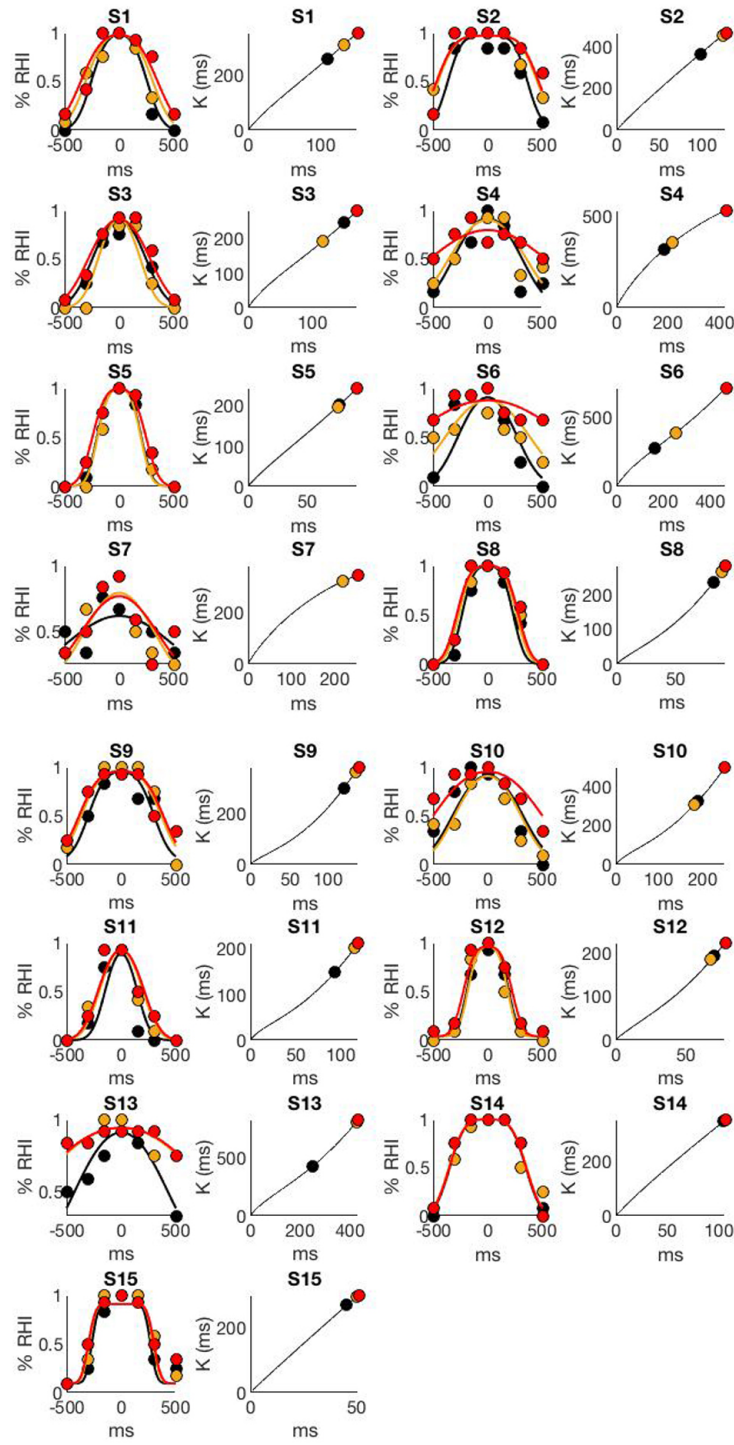

**Figure 2 - Supplement 3 - Individual data and BCI\* model fit**

The figure display two plots per participant, the “yes [the rubber hand felt like my own hand]” answers as a function of visuo-tactile asynchrony (dots) and corresponding BCI\* model fit (curves) are plotted on the left; the right plot represents the evolution of the BCI decision criteria with sensory noise and the 3 dots highlight the decision criteria for the conditions tested in the present study. As in the main figure, black, orange, and red correspond to the 0%, 30%, and 50% noise levels, respectively. This model shares the generative model and decision rule of the BCI model. However, the level of noise impacting the stimulation  $\sigma_s$  is considered as a free parameter instead of being fixed. Thus, six parameters need to be fitted:  $\theta = \{p_{\text{same}}, \sigma_1, \sigma_2, \sigma_3, \sigma_s, \lambda\}$ .
