# Supplementary material for: Uncertainty-based inference of a common cause for body ownership
Source: eLife journal article supplement (doi:10.7554/elife.77221), 2022-09-27
Supplement: supp [file elife-77221-supp-v1.zip]

*Rate the items according to what you felt (-3: I completely disagree; +3: I completely agree)*

*Q1. It seemed as if I were feeling the touch in the location where I saw the rubber hand touched.*

|                          |                          |                          |                          |                          |                          |                          |
|--------------------------|--------------------------|--------------------------|--------------------------|--------------------------|--------------------------|--------------------------|
| -3                       | -2                       | -1                       | 0                        | +1                       | +2                       | +3                       |
| <input type="checkbox"/> |

*Q2. It seemed as though the touch I felt was caused by the stick touching the rubber hand*

|                          |                          |                          |                          |                          |                          |                          |
|--------------------------|--------------------------|--------------------------|--------------------------|--------------------------|--------------------------|--------------------------|
| -3                       | -2                       | -1                       | 0                        | +1                       | +2                       | +3                       |
| <input type="checkbox"/> |

*Q3. I felt as if the rubber hand were my hand*

|                          |                          |                          |                          |                          |                          |                          |
|--------------------------|--------------------------|--------------------------|--------------------------|--------------------------|--------------------------|--------------------------|
| -3                       | -2                       | -1                       | 0                        | +1                       | +2                       | +3                       |
| <input type="checkbox"/> |

*Q4. It felt as if my (real) hand were drifting towards up (towards the rubber hand).*

|                          |                          |                          |                          |                          |                          |                          |
|--------------------------|--------------------------|--------------------------|--------------------------|--------------------------|--------------------------|--------------------------|
| -3                       | -2                       | -1                       | 0                        | +1                       | +2                       | +3                       |
| <input type="checkbox"/> |

*Q5. It seemed as if I might have more than one left hand or arm.*

|                          |                          |                          |                          |                          |                          |                          |
|--------------------------|--------------------------|--------------------------|--------------------------|--------------------------|--------------------------|--------------------------|
| -3                       | -2                       | -1                       | 0                        | +1                       | +2                       | +3                       |
| <input type="checkbox"/> |

*Q6. It seemed as if the touch I was feeling came from somewhere between my own hand and the rubber hand*

|                          |                          |                          |                          |                          |                          |                          |
|--------------------------|--------------------------|--------------------------|--------------------------|--------------------------|--------------------------|--------------------------|
| -3                       | -2                       | -1                       | 0                        | +1                       | +2                       | +3                       |
| <input type="checkbox"/> |

*Q7. It felt as if my (real) hand was turning 'rubbery'.*

|                          |                          |                          |                          |                          |                          |                          |
|--------------------------|--------------------------|--------------------------|--------------------------|--------------------------|--------------------------|--------------------------|
| -3                       | -2                       | -1                       | 0                        | +1                       | +2                       | +3                       |
| <input type="checkbox"/> |

*Q8. It appeared (visually) as if the rubber hand were drifting towards my hand.*

|                          |                          |                          |                          |                          |                          |                          |
|--------------------------|--------------------------|--------------------------|--------------------------|--------------------------|--------------------------|--------------------------|
| -3                       | -2                       | -1                       | 0                        | +1                       | +2                       | +3                       |
| <input type="checkbox"/> |

*Q9. The rubber hand began to resemble my own (real) hand, in terms of shape, skin tone, freckles or some other visual feature.*

|                          |                          |                          |                          |                          |                          |                          |
|--------------------------|--------------------------|--------------------------|--------------------------|--------------------------|--------------------------|--------------------------|
| -3                       | -2                       | -1                       | 0                        | +1                       | +2                       | +3                       |
| <input type="checkbox"/> |

**Figure 4 – Supplement 1: Questionnaire.** In the main experiment, participants were asked to judge the ownership they felt towards the rubber hand. It was therefore necessary for them to be able to experience the basic rubber hand illusion. Thus, all participants were first tested on a classical rubber hand illusion paradigm to ensure that they could experience the illusion using this questionnaire.
