# Supplementary material for: Uncertainty-based inference of a common cause for body ownership
Source: eLife journal article supplement (doi:10.7554/elife.77221), 2022-09-27
Supplement: supp [file elife-77221-supp-v1.zip]

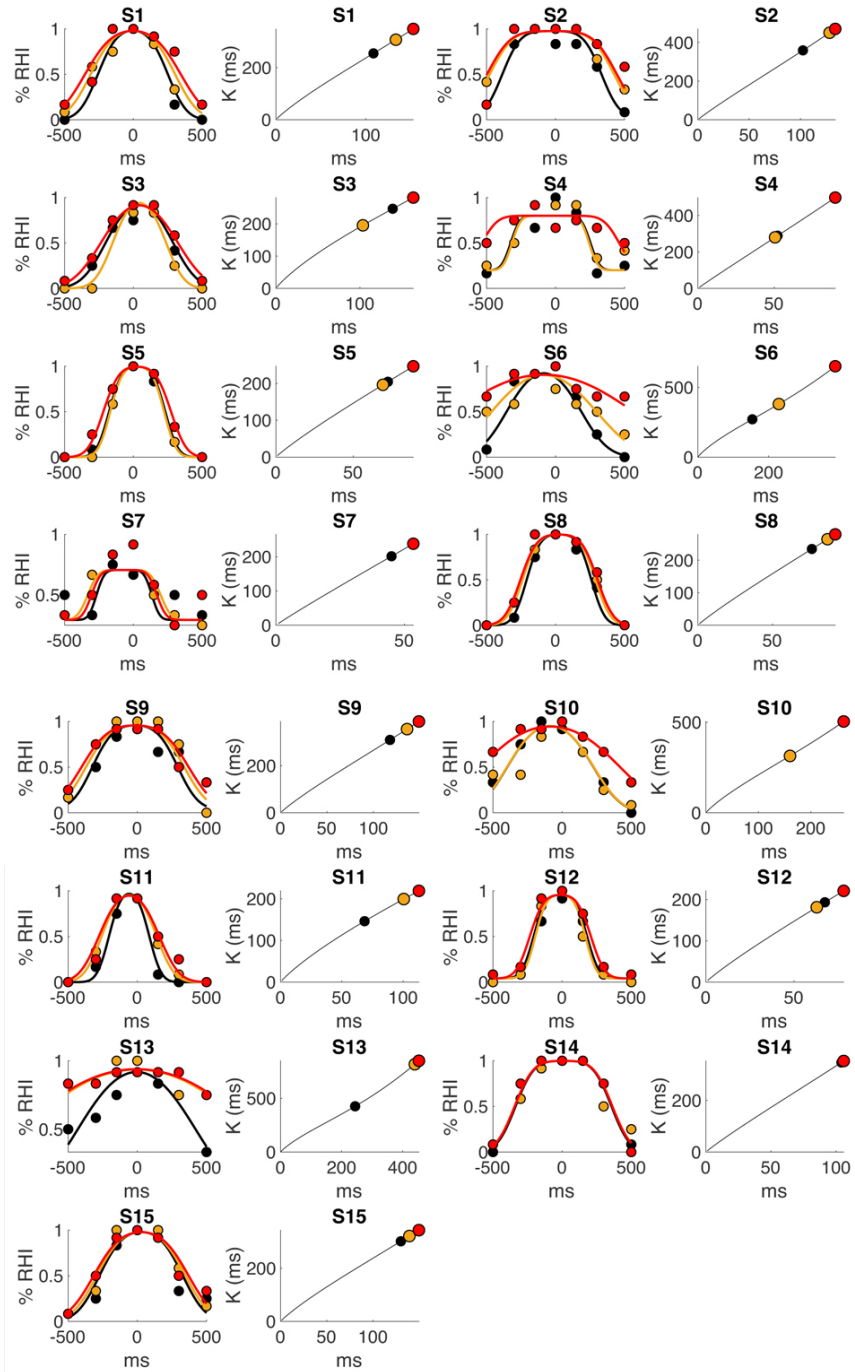

**Figure 2 - Supplement 4 - Individual data and BCIbias model fit**  
The figure display two plots per participant, the “yes [the rubber hand felt like

my own hand]” answers as a function of visuo-tactile asynchrony (dots) and corresponding BCIbias model fit (curves) are plotted on the left; the right plot represents the evolution of the BCI decision criteria with sensory noise and the 3 dots highlight the decision criteria for the conditions tested in the present study. As in the main figure, black, orange, and red correspond to the 0%, 30%, and 50% noise levels, respectively. This model did not assume that the observer treats an asynchrony of 0 as minimal. In this alternative model, the decision criterion is the same as in the BCI model; however, a parameter  $\mu$  (representing the mean of the distribution of asynchrony) is taken into account when computing the predicted answer. A negative  $\mu$  means that the RHI is most likely to emerge when the rubber hand is touched first, a positive  $\mu$  means that the RHI is most likely to emerge when the participant’s hand is touched first. The estimated bias is modest ( $\pm 50$  ms) for most of our participants (11 out of 15). 5 participants showed a positive bias and 10 a negative, and thus no clear systematic bias was observed. Notably, on the group level, the bias did not significantly differ from 0 ( $t(14)=-1.61$ ,  $p = 0.13$ ), and the BIC analysis did not show a clear improvement in the goodness-of-fit compared to our main BCI model (lower bound: -32; raw sum of difference: 22; upper bound: 85). In light of these results, we did not discuss this additional model further.
