# Supplementary material for: Uncertainty-based inference of a common cause for body ownership
Source: eLife journal article supplement (doi:10.7554/elife.77221), 2022-09-27
Supplement: supp [file elife-77221-supp-v1.zip]

Archive with 14 entries (14 files):
- elife_poa_e77221_Figure_2_figure_supplement_1.pdf
- elife_poa_e77221_Figure_2_figure_supplement_2.pdf
- elife_poa_e77221_Figure_2_figure_supplement_3.pdf
- elife_poa_e77221_Figure_2_figure_supplement_4.pdf
- elife_poa_e77221_Figure_2_figure_supplement_5.jpg
- elife_poa_e77221_Figure_3_figure_supplement_1.pdf
- elife_poa_e77221_Figure_3_figure_supplement_2.pdf
- elife_poa_e77221_Figure_3_figure_supplement_3.pdf
- elife_poa_e77221_Figure_4_figure_supplement_1.pdf
- elife_poa_e77221_Figure_4_figure_supplement_2.pdf
- elife_poa_e77221_Figure_3_source_data_1.xlsx
- elife_poa_e77221_Figure_4_source_data_1.xlsx
- elife_poa_e77221_Figure_5_source_data_2.xlsx
- elife_poa_e77221_Transparent_Reporting_File.docx
