# Supplementary material for: Uncertainty-based inference of a common cause for body ownership
Source: eLife journal article supplement (doi:10.7554/elife.77221), 2022-09-27
Supplement: supp [file elife-77221-supp-v1.zip › elife_poa_e77221_Figure_2_figure_supplement_1.pdf]

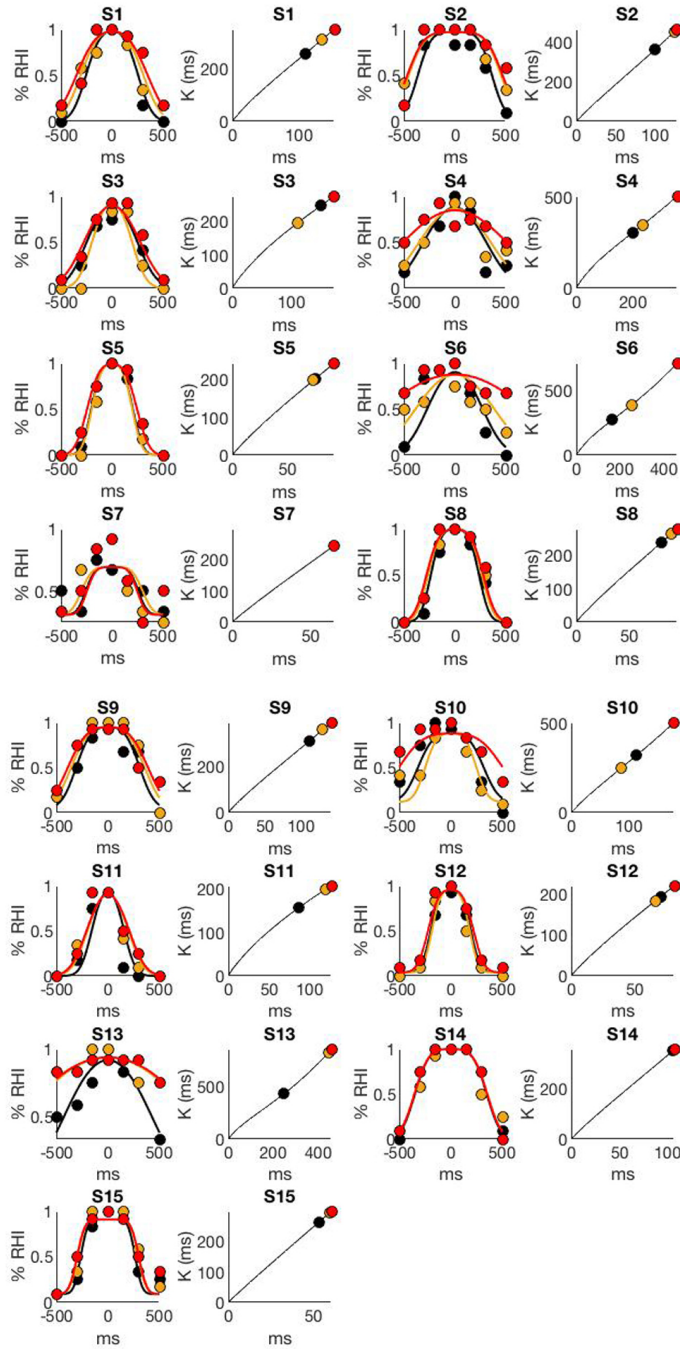

**Figure 2 - Supplement 1 - Individual data and BCI model fit**  
The figure display two plots per participant, the “yes [the rubber hand felt like

my own hand]” answers as a function of visuo-tactile asynchrony (dots) and corresponding BCI model fit (curves) are plotted on the left; the right plot represents the evolution of the BCI decision criteria with sensory noise and the 3 dots highlight the decision criteria for the conditions tested in the present study. As in the main text, black, orange, and red correspond to the 0%, 30%, and 50% noise levels, respectively
