# Supplementary material for: Uncertainty-based inference of a common cause for body ownership
Source: eLife journal article supplement (doi:10.7554/elife.77221), 2022-09-27
Supplement: supp [file elife-77221-supp-v1.zip › elife_poa_e77221_Figure_2_figure_supplement_2.pdf]

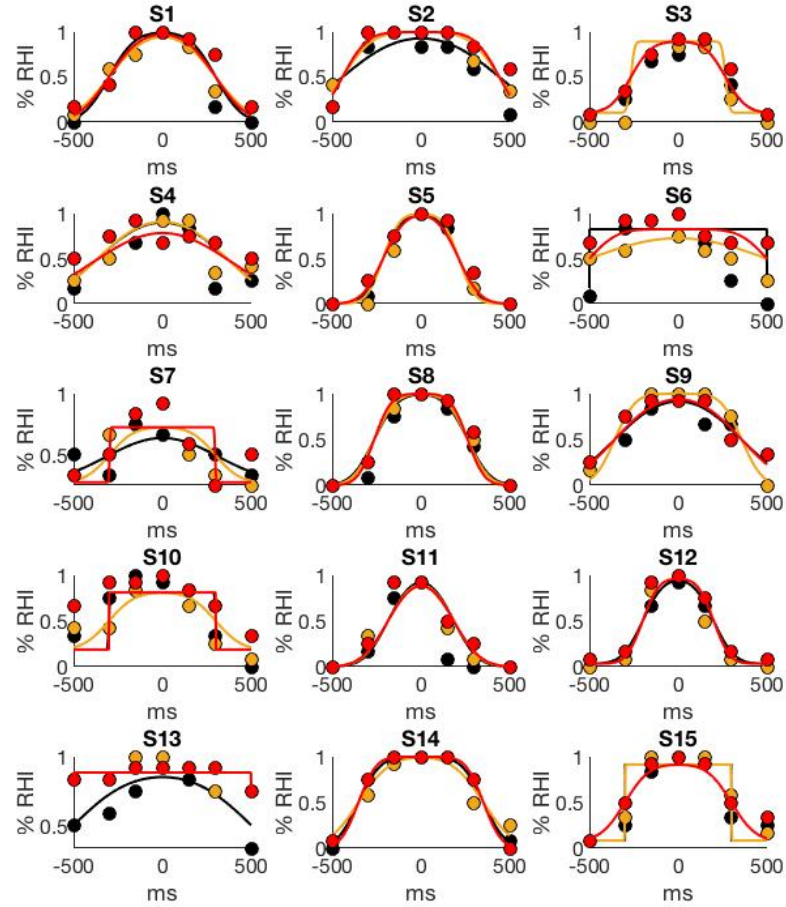

**Figure 2 - Supplement 2 - Individual data and FC model fit**

The figure display one plot per participant, the “yes [the rubber hand felt like my own hand]” answers as a function of visuo-tactile asynchrony (dots) and corresponding FC (non Bayesian) model fit (curves) are plotted. As in the main figure, black, orange, and red correspond to the 0%, 30%, and 50% noise levels, respectively.
