# Supplementary material for: Uncertainty-based inference of a common cause for body ownership
Source: eLife journal article supplement (doi:10.7554/elife.77221), 2022-09-27
Supplement: supp [file elife-77221-supp-v1.zip › elife_poa_e77221_Figure_3_figure_supplement_1.pdf]

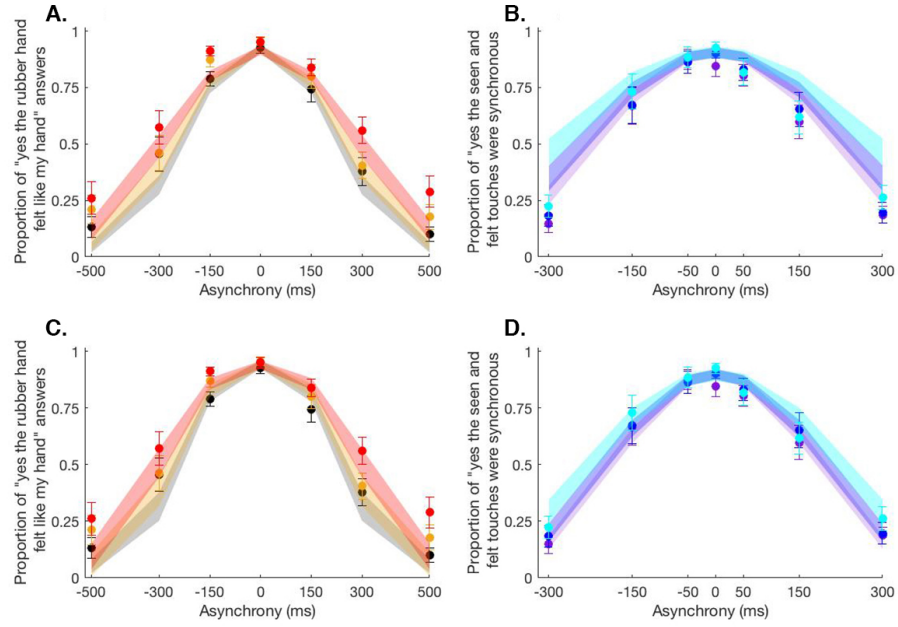

|      | Different $p_{\text{same}}$ |                             |            |               |               |           |       | All shared parameter |            |               |               |           |       |
|------|-----------------------------|-----------------------------|------------|---------------|---------------|-----------|-------|----------------------|------------|---------------|---------------|-----------|-------|
|      | $p_{\text{same,ownership}}$ | $p_{\text{same,synchrony}}$ | $\sigma_0$ | $\sigma_{30}$ | $\sigma_{50}$ | $\lambda$ | $NLL$ | $p_{\text{same}}$    | $\sigma_0$ | $\sigma_{30}$ | $\sigma_{50}$ | $\lambda$ | $NLL$ |
| Mean | 0.83                        | 0.65                        | 101        | 109           | 130           | 0.10      | 221   | 0.63                 | 133        | 149           | 178           | 0.05      | 234   |
| SEM  | 0.0                         | 0.01                        | 8          | 8             | 14            | 0.0       | 11    | 0.01                 | 12         | 16            | 21            | 0.0       | 10    |

**Figure 3 - Supplement 1: Mean + SEM behavioural (dots) and model (shaded areas) results for body ownership (A & C) and synchrony detection (B & D) tasks in the *extension* analysis.** The BCI model is fitted to the body ownership and synchrony data combined. Observed data for the 0% (black/purple dots), 30% (orange/dark blue dots), and 50% (red/light blue dots) of visual noise (body ownership/synchrony) and the corresponding predictions for the BCI model with a shared  $p_{\text{same}}$  (A & B) and with distinct  $p_{\text{same}}$  for each task (C & D). Below are the corresponding estimated parameters and negative log likelihood.
