# Supplementary material for: Uncertainty-based inference of a common cause for body ownership
Source: eLife journal article supplement (doi:10.7554/elife.77221), 2022-09-27
Supplement: supp [file elife-77221-supp-v1.zip › elife_poa_e77221_Figure_3_source_data_1.xlsx]

## Sheet: RHIdetect
	N0_-500	N0_-300	N0_-150	N0_0	N0_150	N0_300	N0_500	N30_-500	N30_-300	N30_-150	N30_0	N30_150	N30_300	N30_500	N50_-500	N50_-300	N50_-150	N50_0	N50_150	N50_300	N50_500
S1	0	7	9	12	11	2	0	1	7	9	12	10	4	2	2	5	12	12	11	9	2
S2	2	10	12	10	10	7	1	5	12	12	12	12	8	4	2	12	12	12	12	10	7
S3	0	3	8	9	11	5	1	0	0	9	10	10	3	0	1	4	9	11	11	7	1
S4	2	9	8	12	10	2	3	3	6	11	11	11	4	5	6	9	11	8	9	8	6
S5	0	1	7	12	10	2	0	0	0	7	12	11	2	0	0	3	9	12	11	4	0
S6	1	10	11	12	8	3	0	6	7	11	9	7	6	3	8	11	11	12	9	8	8
S7	6	4	9	8	6	6	4	4	8	10	11	6	4	3	4	6	10	11	7	3	6
S8	0	1	9	12	10	5	0	0	3	10	12	11	6	0	0	3	12	12	11	7	0
S9	2	6	10	11	8	8	0	2	9	12	12	12	9	0	3	9	11	11	11	6	4
S10	4	9	12	11	8	4	0	5	5	10	12	8	3	1	8	11	11	12	10	8	4
S11	0	2	9	11	1	0	0	0	4	11	11	5	1	0	0	3	11	11	6	3	0
S12	0	1	8	11	8	2	1	0	1	10	12	6	1	0	1	2	11	12	9	2	1
S13	6	7	9	12	10	9	4	10	10	12	12	11	9	9	10	10	11	11	11	11	9
S14	0	9	11	12	12	9	1	1	7	11	12	12	6	3	1	9	12	12	12	9	0
S15	1	3	10	12	11	4	3	1	4	12	12	12	7	2	1	6	11	12	11	6	4
