# Supplementary material for: Uncertainty-based inference of a common cause for body ownership
Source: eLife journal article supplement (doi:10.7554/elife.77221), 2022-09-27
Supplement: supp [file elife-77221-supp-v1.zip › elife_poa_e77221_Figure_4_source_data_1.xlsx]

## Sheet: BCI
Parameter estimates for the BCI model
Participant	psame	σ_0	𝜎_30	σ_50	Lapse	NLL
1	0.778155	108.665	133.397	152.699	2.6269e-07	98.9016
2	0.991912	99.856	124.313	128.082	0.062408	90.3937
3	0.548171	149.477	110.178	171.836	5.6914e-07	106.533
4	0.540012	199.888	235.029	356.797	0.000604897	140.219
5	0.854294	76.6363	74.427	93.7859	6.05248e-16	69.8213
6	0.554305	165.787	252.998	462.248	1.81145e-07	129.345
7	0.993142	68.8851	80.6785	65.9163	0.614799	161.164
8	0.93438	79.5166	89.6938	94.9537	5.04885e-15	72.6534
9	0.902651	111.85	129.968	142.007	0.0889807	108.101
10	0.914007	113.421	87.0495	179.433	0.235127	126.7
11	0.518611	86.0563	117.898	125.504	4.80125e-09	90.4795
12	0.87484	70.7062	66.5427	81.4922	0.0748796	85.7455
13	0.612016	244.75	442.177	454.914	0.00188876	107.624
14	0.977519	104.971	107.036	106.29	2.98015e-16	74.9122
15	0.999958	53.1739	59.4646	60.5926	0.183391	104.046

## Sheet: FC
Parameter estimates for the FC model
Participant	σ_0	𝜎_30	σ_50	K0	Lapse	NLL
1	114.306	156.71	137.069	300.74	1.35095e-13	102.343
2	244.611	132.039	109.628	441.67	3.02254e-16	91.6622
3	91.7235	17.0588	91.1629	266.563	0.210408	109.131
4	210.312	204.578	287.523	363.971	0.0368432	143.616
5	83.3332	72.477	94.7139	213.173	2.22384e-16	71.8481
6	0.104472	349.825	121.81	499.587	0.348454	138.572
7	229.896	107.317	4.14742	296.855	0.548539	160.552
8	100.927	91.9351	74.9248	262.631	2.24342e-16	73.6679
9	206.612	90.8668	190.498	357.128	5.21303e-16	105.017
10	5.14317	113.501	0.45457	300.826	0.376351	135.265
11	106.255	114.32	118.441	185.571	1.56157e-15	93.2833
12	90.5082	71.9545	71.067	200.228	0.0672512	86.5991
13	247.379	0.0373282	1.2851	501.488	0.229432	110.96
14	97.4988	136.343	79.2841	352.017	7.89485e-10	72.5917
15	0.394812	2.0702	106.615	299.734	0.166304	103.852

## Sheet: BCIstar_Supplement3
Parameter estimates for the BCI* model
Participant	psame	σ_0	𝜎_30	σ_50	σ_s	Lapse	NLL
1	0.791485	109.634	132.616	150.984	280.128	0.000146385	98.8948
2	0.930243	98.0538	124.059	127.993	7138.04	0.0639919	90.4561
3	0.592953	147.325	115.615	168.028	180.977	1.80918e-07	106.432
4	0.437779	182.384	216.046	420.444	979.47	0.000863096	139.538
5	0.875222	77.5639	75.7594	92.6108	166.872	7.55747e-05	69.8165
6	0.553557	165.037	253.285	467.598	393.028	0.000363239	129.344
7	0.0410841	414.856	217.731	252.615	14739.9	0.182859	160.755
8	0.776019	82.0171	88.6316	92.471	61.3112	1.72874e-05	72.3566
9	0.635808	119.363	134.116	138.286	62.1271	0.0771475	107.776
10	0.552623	188.526	180.915	252.132	105.566	0.00384185	126.505
11	0.535387	93.7531	115.308	119.896	47.5644	3.72886e-05	89.9368
12	0.804554	70.5223	68.1898	78.2287	65.5929	0.0750822	85.5991
13	0.600533	251.197	425.388	434.436	310.255	0.00422211	107.603
14	0.581573	104.763	107.347	106.022	18421.9	2.33814e-10	74.9028
15	0.819419	45.6672	50.2109	51.2981	13809.2	0.187182	103.978

## Sheet: BCIbias_Supplement4
Parameter estimates for the BCI_bias model
Participant	psame	σ_0	𝜎_30	σ_50		Lapse	NLL
1	0.777705	108.536	133.466	152.873	-3.25761	2.08141e-08	98.8709
2	0.987904	102.375	128.301	133.842	-26.4641	0.0476409	89.0042
3	0.578611	139.115	103.638	163.675	43.9433	2.312e-08	102.392
4	0.999998	52.1903	50.5528	89.9419	-36.4824	0.400713	138.034
5	0.897802	72.3701	69.1223	88.7551	27.9533	7.93781e-15	65.5799
6	0.588003	153.757	228.608	387.774	-84.0533	1.61682e-07	121.663
7	0.999572	44.9655	59.7639	53.4432	-66.6284	0.588195	158.175
8	0.948315	76.3502	86.8175	92.0074	24.9519	5.92307e-16	69.6789
9	0.872822	117.805	136.228	148.945	-16.2608	0.0682522	107.614
10	0.664352	159.415	160.339	262.69	-85.0811	1.41834e-07	115.88
11	0.616784	68.5325	100.513	112.857	-59.1693	1.39422e-08	77.4815
12	0.90296	67.5014	62.9078	78.1726	-12.8086	0.0811608	85.0555
13	0.612697	244.38	440.066	453.351	-4.71461	0.00127133	107.614
14	0.978991	104.125	106.101	105.86	10.0393	3.17287e-16	74.5759
15	0.781469	130.162	139.43	149.704	27.4949	4.25322e-09	102.668

## Sheet: ParameterRecovery_Supplement 5
	Initial					Recovered
Participant
S1	0.53	246	164	129	0.09	0.51	264	176	133	0.11
S2	0.74	183	204	130	0.15	0.86	152	171	109	0.21
S3	0.39	281	96	223	0.15	0.41	313	111	251	0.09
S4	0.9	97	32	85	0.02	0.89	94	33	83	0.02
S5	0.73	185	96	29	0.07	0.74	176	101	31	0.07
S6	0.54	238	198	215	0.19	0.5	294	221	275	0
S7	0.26	138	275	110	0.12	0.27	151	17803	123	0.12
S8	0.9	1	240	141	0.01	0.87	25	256	146	0.01
S9	0.69	7	265	296	0.08	0.66	0	274	316	0.06
S10	0.19	10	142	12	0.05	0.36	36	4776	4	0.05
S11	0.75	50	3	213	0.16	0.76	47	34	230	0.18
S12	0.69	108	270	191	0.1	0.67	111	272	213	0.09
S13	0.81	224	46	181	0.08	0.79	237	48	193	0.06
S14	0.22	22	203	83	0.01	0.22	34	232	76	0.02
S15	0.4	215	247	156	0.05	0.39	232	223	157	0.03
