# Supplementary material for: Uncertainty-based inference of a common cause for body ownership
Source: eLife journal article supplement (doi:10.7554/elife.77221), 2022-09-27
Supplement: supp [file elife-77221-supp-v1.zip › elife_poa_e77221_Figure_5_source_data_2.xlsx]

## Sheet: ExtensionAnalysis
Parameter estimates in the extension analysis (ownership & synchrony) - All shared parameters
Participant	psame	σ_0	𝜎_30	σ_50	Lapse		NLL
1	0.494708	139.375	177.043	192.711	2.22045e-16		257.664
2	0.629773	153.794	198.693	197.283	2.22045e-16		227.42
3	0.458872	181.876	130.004	186.056	2.22045e-16		262.419
4	0.528748	189.828	225.413	342.839	2.22045e-16		277.664
5	0.62284	94.4323	95.3679	116.754	2.22045e-16		188.642
6	0.576117	166.453	215.258	295.429	2.22045e-16		247.48
7	0.997119	42.1131	50.0895	48.5965	0.637063		322.539
8	0.778599	90.3209	93.7404	103.216	2.22045e-16		168.715
9	0.622017	136.973	160.454	179.209	2.22045e-16		226.146
10	0.531599	190.769	183.542	254.152	2.22045e-16		271.109
11	0.487582	88.3326	104.759	117.269	2.22045e-16		203.269
12	0.639448	81.9886	83.4218	93.7172	0.0584514		195.072
13	0.611277	200.126	271.777	275.912	2.22045e-16		227.625
14	0.574083	150.442	147.882	152.696	2.22045e-16		224.943
15	0.901746	84.2064	93.2456	111.639	0.112856		207.291
Parameter estimates in the extension analysis (ownership & synchrony) - Different psame
Participant	psame_ownership	σ_0	𝜎_30	σ_50	Lapse	psame_synchrony	NLL
1	0.765952	114.858	136.99	149.595	2.22045e-16	0.474886	241.105
2	0.999276	86.6734	104.644	105.406	0.0626287	0.77827	187.849
3	0.522842	164.856	123.773	173.142	2.22045e-16	0.450141	260.252
4	0.836003	114.788	136.431	191.539	0.269611	0.678786	276.15
5	0.707883	91.0232	92.0821	112.144	2.22045e-16	0.61196	187.476
6	0.625218	159.813	203.963	281.568	2.22045e-16	0.570681	246.178
7	0.916388	88.4769	100.528	88.8127	0.522509	0.503465	318.239
8	0.944963	80.9816	84.0618	92.4122	2.22045e-16	0.761617	160.336
9	0.992527	82.9767	97.6809	105.23	0.118029	0.796785	210.468
10	0.830006	135.198	124.92	176.275	0.134807	0.566024	261.722
11	0.578494	83.9766	99.2074	110.756	2.22045e-16	0.475135	201.652
12	0.830207	74.3829	74.1477	84.3111	0.0675182	0.63404	192.129
13	1	65.8493	76.4997	76.3126	0.163668	0.991585	194.998
14	0.991759	96.4749	94.9443	98.0072	2.22045e-16	0.570791	175.69
15	0.965553	81.9125	91.3548	109.095	0.0965168	0.851735	202.535

## Sheet: TransferAnalysis
O to S = We use the parameters estimated for the ownership data to fit the synchrony data
	Partial transfer						FullTransfer
Participant	psame	σ_0	𝜎_30	σ_50	Lapse	NLL	psame	σ_0	𝜎_30	σ_50	Lapse	NLL
1	0.476087	108.665	133.397	152.699	2.6269e-07	142.558	0.778155	108.665	133.397	152.699	2.6269e-07	224.221
2	0.686477	99.856	124.313	128.082	0.062408	99.2416	0.991912	99.856	124.313	128.082	0.062408	194.392
3	0.451433	149.477	110.178	171.836	5.6914e-07	154.763	0.548171	149.477	110.178	171.836	5.6914e-07	172.985
4	0.521088	199.888	235.029	356.797	0.000604897	137.208	0.540012	199.888	235.029	356.797	0.000604897	139.052
5	0.703365	76.6363	74.427	93.7859	6.05248e-16	121.82	0.854294	76.6363	74.427	93.7859	6.05248e-16	131.566
6	0.528727	165.787	252.998	462.248	1.81145e-07	121.012	0.554305	165.787	252.998	462.248	1.81145e-07	124.396
7	0.6754	68.8851	80.6785	65.9163	0.614799	157.862	0.993142	68.8851	80.6785	65.9163	0.614799	168.802
8	0.746005	79.5166	89.6938	94.9537	5.04885e-15	88.2861	0.93438	79.5166	89.6938	94.9537	5.04885e-15	111.548
9	0.638725	111.85	129.968	142.007	0.0889807	105.111	0.902651	111.85	129.968	142.007	0.0889807	138.82
10	0.613602	113.421	87.0495	179.433	0.235127	138.342	0.914007	113.421	87.0495	179.433	0.235127	157.703
11	0.464182	86.0563	117.898	125.504	4.80125e-09	112.987	0.518611	86.0563	117.898	125.504	4.80125e-09	115.975
12	0.665656	70.7062	66.5427	81.4922	0.0748796	106.71	0.87484	70.7062	66.5427	81.4922	0.0748796	117.05
13	0.522161	244.75	442.177	454.914	0.00188876	113.81	0.612016	244.75	442.177	454.914	0.00188876	159.865
14	0.544129	104.971	107.036	106.29	2.98015e-16	101.899	0.977519	104.971	107.036	106.29	2.98015e-16	279.281
15	0.998437	53.1739	59.4646	60.5926	0.183391	103.308	0.999958	53.1739	59.4646	60.5926	0.183391	109.594
S to O = We use the parameters estimated for the synchrony data to fit the ownership data
	Partial transfer						FullTransfer
Participant	psame	σ_0	𝜎_30	σ_50	Lapse	NLL	psame	σ_0	𝜎_30	σ_50	Lapse	NLL
1	0.99746	74.3114	82.4107	66.3882	0.312147	112.461	0.61007	74.3114	82.4107	66.3882	0.312147	147.272
2	0.999634	88.7317	100.384	95.6034	0.0266399	95.4885	0.794695	88.7317	100.384	95.6034	0.0266399	202.365
3	0.479762	240.257	139.628	164.359	0.000279284	112.62	0.454701	240.257	139.628	164.359	0.000279284	113.284
4	0.999121	67.9902	77.0102	95.8729	0.348421	144.321	0.98373	67.9902	77.0102	95.8729	0.348421	148.828
5	0.634977	98.842	105.127	122.875	2.43821e-06	73.1508	0.576269	98.842	105.127	122.875	2.43821e-06	73.981
6	0.99708	96.485	97.764	103.689	0.140211	154.229	0.923533	96.485	97.764	103.689	0.140211	166.717
7	0.626285	161.655	148.295	175.717	0.000831411	184.658	0.448482	161.655	148.295	175.717	0.000831411	204.762
8	0.953248	84.2397	77.4623	90.3184	6.15454e-13	74.8264	0.774751	84.2397	77.4623	90.3184	6.15454e-13	91.3769
9	0.999284	70.8315	84.3672	87.9971	0.106508	111.717	0.895377	70.8315	84.3672	87.9971	0.106508	148.868
10	0.999985	66.4508	64.5903	54.1565	0.313287	148.202	0.990871	66.4508	64.5903	54.1565	0.313287	161.557
11	0.784744	71.9617	74.1791	80.2015	0.0555159	97.7086	0.524223	71.9617	74.1791	80.2015	0.0555159	104.9
12	0.765949	80.6298	94.9838	94.0517	3.87385e-11	98.2163	0.568611	80.6298	94.9838	94.0517	3.87385e-11	106.128
13	1	68.0975	72.851	71.903	0.0334987	158.932	0.993432	68.0975	72.851	71.903	0.0334987	295.512
14	0.998135	92.7638	74.0209	95.1324	1.16045e-08	85.7857	0.607883	92.7638	74.0209	95.1324	1.16045e-08	235.403
15	0.946331	96.586	97.7053	124.875	1.08778e-08	112.537	0.758453	96.586	97.7053	124.875	1.08778e-08	134.082

## Sheet: SynchronyDetect_Supplement3
Participant	N0_-300	N0_-150	N0_-50	N0_0	N0_50	N0_150	N0_300	N30_-300	N30_-150	N30_-50	N30_0	N30_50	N30_150	N30_300	N50_-300	N50_-150	N50_-50	N50_0	N50_50	N50_150	N50_300
S1	0	0	7	10	12	11	4	0	0	4	11	12	12	5	0	0	6	11	11	10	4
S2	2	8	12	11	10	7	3	5	11	12	12	12	10	0	3	12	12	12	10	7	2
S3	1	1	5	5	8	11	2	0	3	8	10	11	8	5	0	3	6	10	8	11	5
S4	3.6	7.2	9.6	7.2	10.8	9.6	3.6	6	12	8.4	9.6	9.6	9.6	2.4	7.2	9.6	12	10.8	12	7.2	7.2
S5	2	12	12	11	10	2	0	3	12	12	11	8	2	0	5	12	11	11	9	4	0
S6	5	10	12	11	11	10	5	6	10	12	9	10	11	4	6	11	11	12	12	9	6
S7	4	12	12	7	4	0	0	3	12	11	9	3	2	0	5	12	11	9	2	1	0
S8	0	7	12	12	11	8	3	0	6	12	11	12	7	2	2	8	12	12	12	8	2
S9	0	9	10	12	11	9	2	4	8	10	12	11	10	2	3	10	11	11	12	10	3
S10	5	11	12	10	8	7	2	2	10	12	10	9	9	4	1	11	12	9	9	6	3
S11	0	4	10	10	9	4	1	0	5	8	12	11	5	0	1	4	8	12	9	5	1
S12	0	10	11	11	7	3	0	1	10	12	11	9	2	1	1	10	12	12	9	2	1
S13	3	12	11	12	12	10	3	2	11	12	12	11	12	6	3	10	12	12	12	12	5
S14	1	10	11	11	10	6	0	0	5	10	11	9	7	0	0	9	12	11	9	8	1
S15	0	7	11	12	11	10	5	1	6	12	12	12	11	4	3	10	11	12	11	11	7
