# Supplementary figures and images for: Uncertainty-based inference of a common cause for body ownership
Source: eLife journal article supplement (doi:10.7554/elife.77221), 2022-09-27

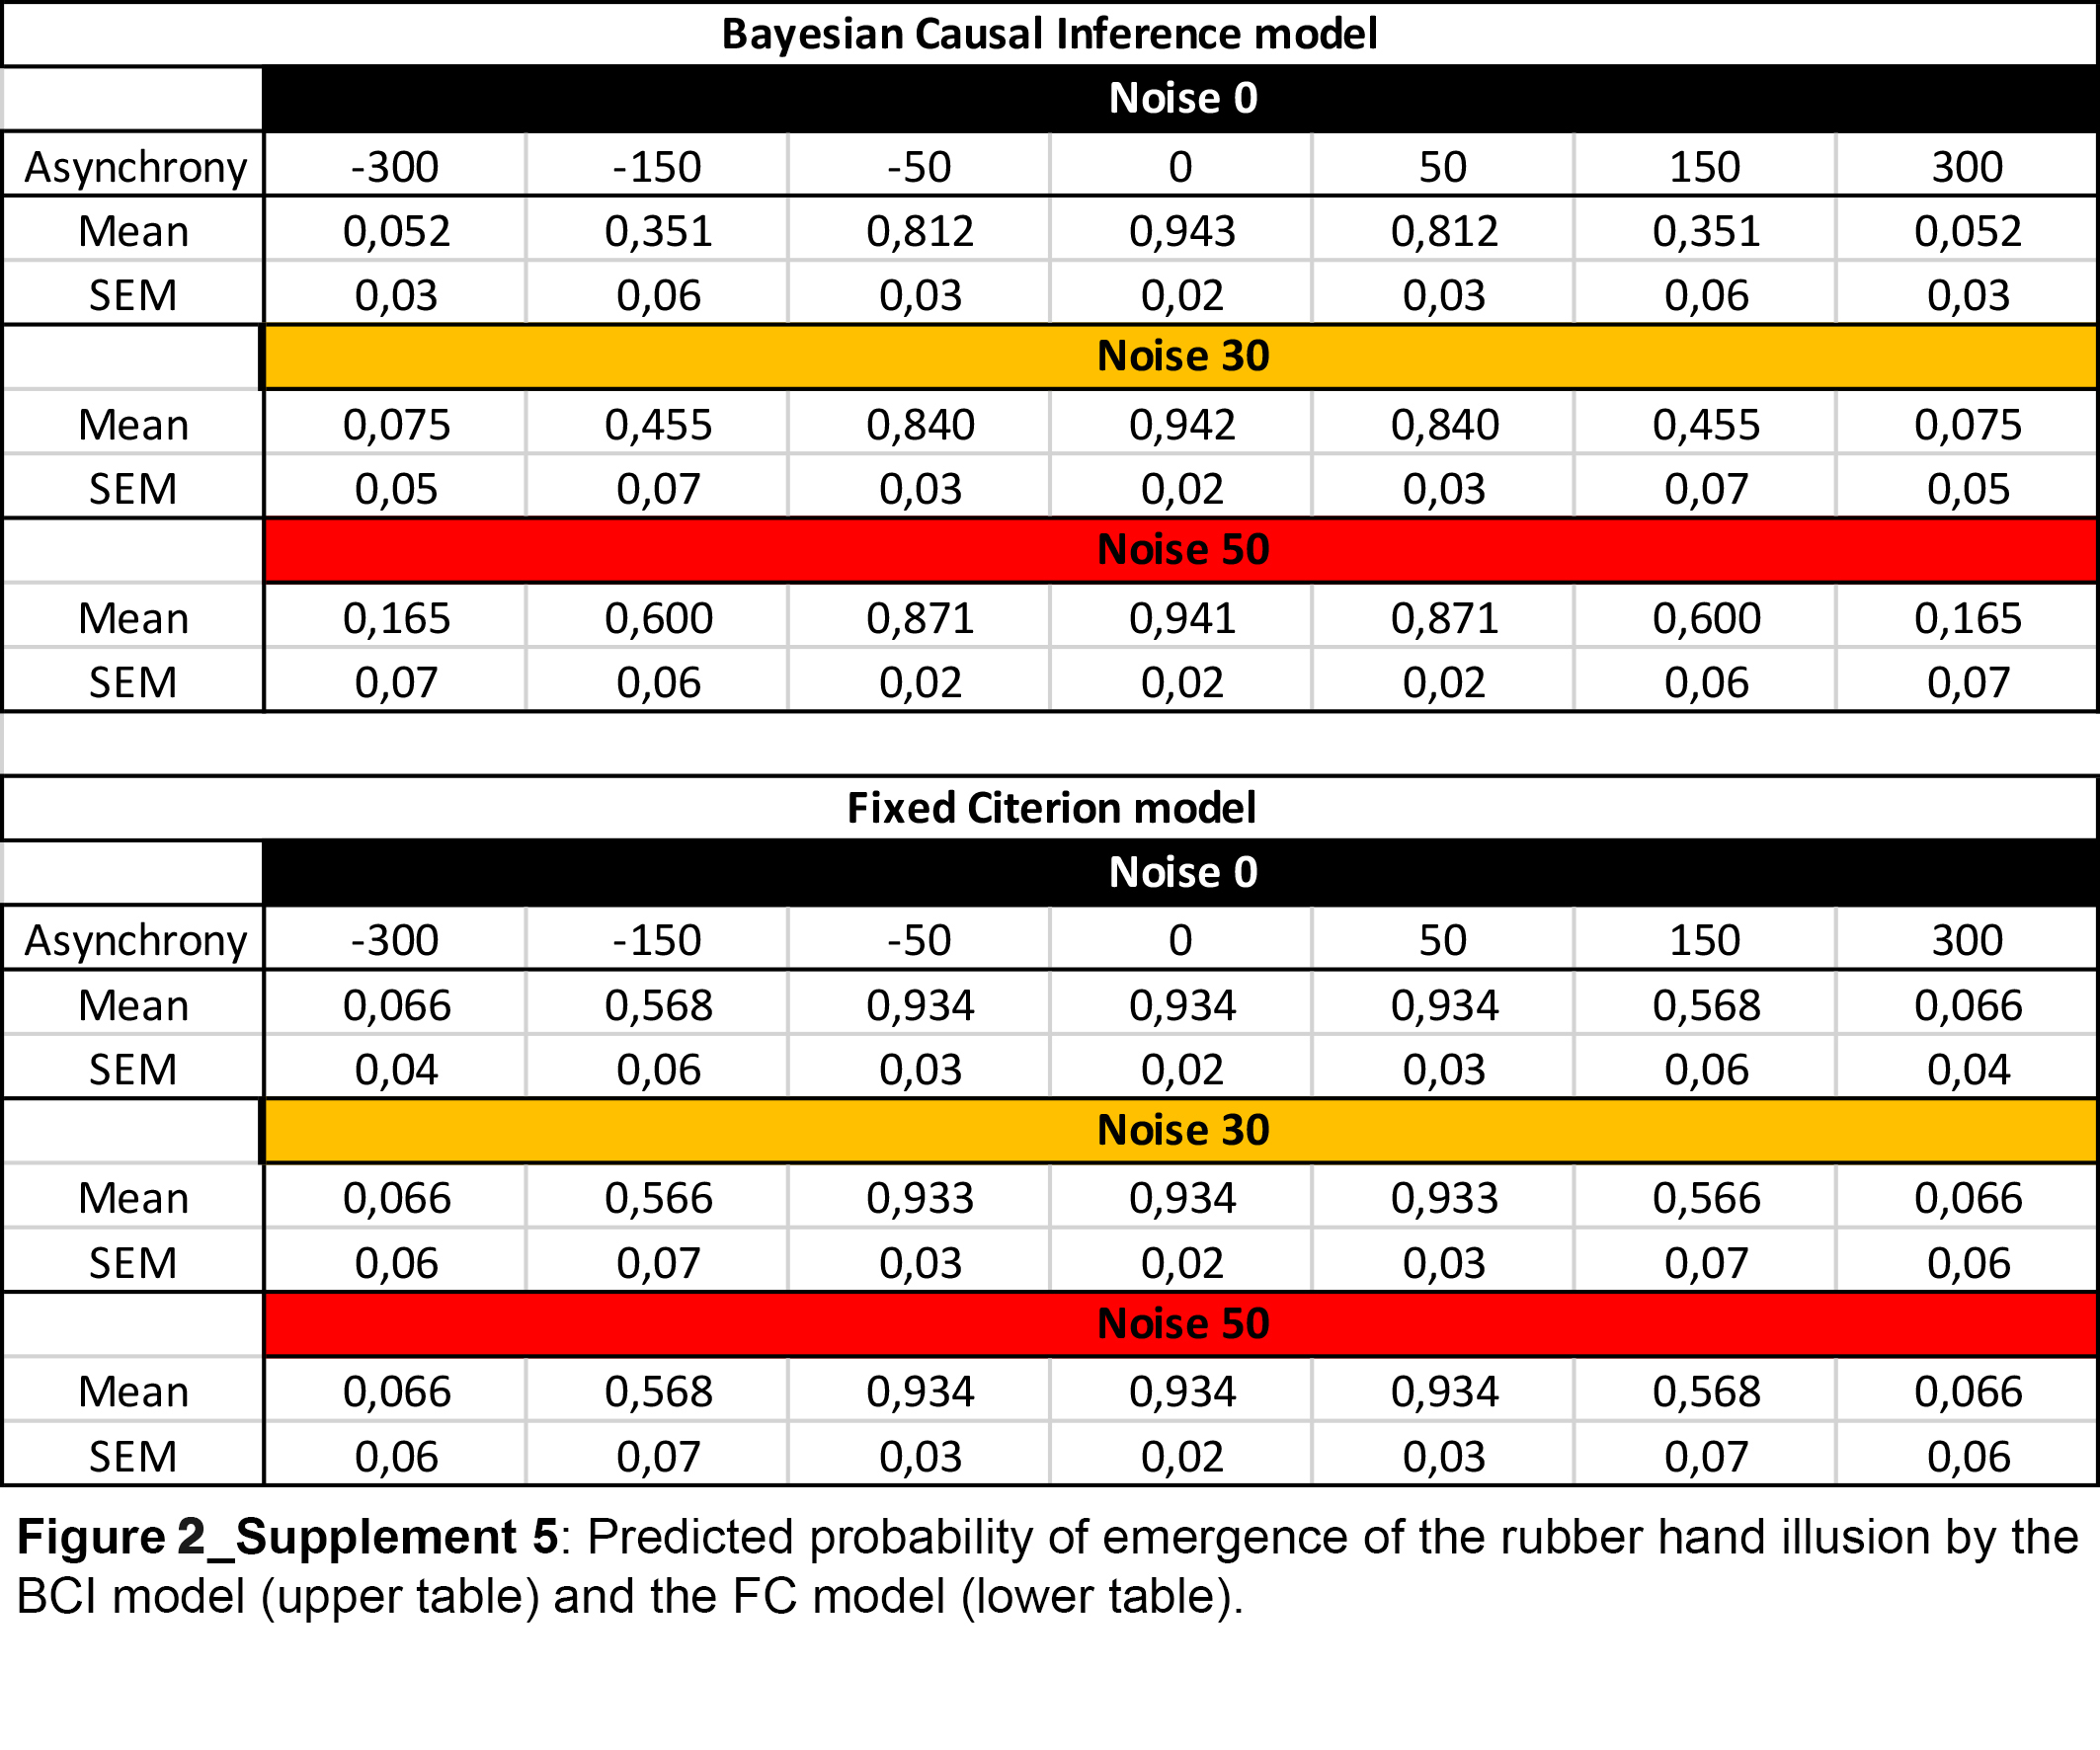

Supplement: supp [file elife-77221-supp-v1.zip › elife_poa_e77221_Figure_2_figure_supplement_5.jpg]
